# Supplementary material for: Enhancing postharvest shelf life of Ficus Rubra using a bio-based Pickering nanoemulsion coating enriched with Pelargonium essential oil
Source: Research Square preprint supplement (doi:10.21203/rs.3.rs-6742413/v1), 2025-06-09
Supplement: Supplementary file 1 [file adc64962c2a241ed7329f05d.docx]

**Highlight**

1. Biodegradable food coatings have arisen as an environmentally friendly solution for perishable fruit
2. Integrating nanotechnology into food coatings enhances the stability of active compounds
3. Pickering emulsions offer a solution to maximize the potential utilization of hydrophobic and oxidation-prone compounds
4. Pickering emulsions enhance their preserving properties for bioactive properties.
